# Supplementary material for: Allosteric agonists of the calcium receptor (CaR): fluorine and SF5 analogues of cinacalcet
Source: Royal Society of Chemistry journal article supplement (doi:10.1039/c2ob26402a), 2012-01-01
Supplement: c2ob26402a.pdf [file c2ob26402a.pdf]

## Supplementary Information

### Allosteric agonists of the calcium receptor (CaR): Fluorine and SF<sub>5</sub> analogues of cinacalcet

5

Poh Wai Chia<sup>a</sup>, Sarah C. Brennan<sup>b</sup>, Alexandra M. S. Slawin<sup>a</sup>, Daniela Riccardi<sup>b</sup> and David O'Hagan<sup>\*a</sup>

GC-MS analysis for determination of enantiopurity of intermediate aldehydes (*R*)-7 and (*S*)-7.

10

Chiral phase GC-MS analysis used a Betadex<sup>TM</sup> 120 fused silica capillary column (30 m × 0.25 mm i.d., 0.25 μm film thickness). Monitoring of the α-fluoroaldehyde 7 was carried out by extracting an aliquot (0.5 ml) from the reaction at hourly intervals. This aliquot was passed through a 25 mm Whatmann syringe filter. The filtrates were transferred into a GC vial and then make up to 1 ml with DCM. This solution 15 was injected directly onto GCMS with DCM solvent as a control. The oven was held at 80 °C for 20 min, then heated at a gradient of 20 °C/min to 150 °C, 250 °C injector temperature; 100:1 split ratio, 1.0 mL/min flow. The GC-MS chromatogram shown in Figure 1.0 shows a major peak at the retention time of 36.24 min, which corresponds to (*R*)-7 ([M]<sup>+</sup>, *m/z* = 220, while the minor peak shown at the retention time of 33.16 min was assigned to be the difluorinated compound 8 ([M]<sup>+</sup>, *m/z* = 238). The enantiomeric ratio of (*R*)-7 determined 20 from the chiral phase GC-MS ~ 97%ee. The MS (EI) spectra of the peak at 33.16 (Figure S1.1) and 36.2 min (Figure S1.2) showed an identical fragment pattern of *m/z* = 159, which corresponds to [M-CHFCHO]<sup>+</sup>.

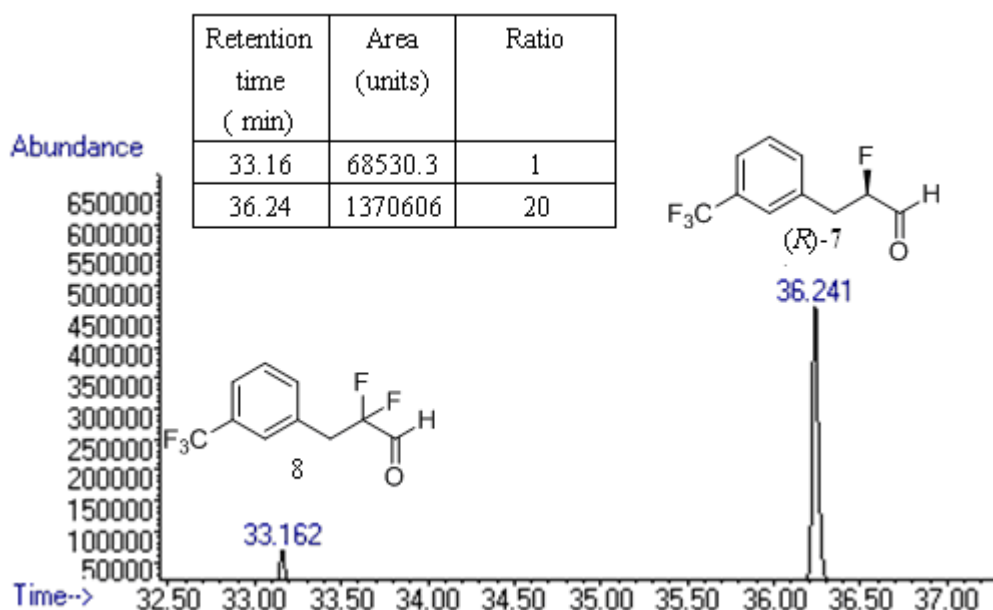

25 **Figure S1.0** The chiral phase GC chromatogram of (*R*)-7.: oven started at 80 °C and held for 20 min (gradient at 20 °C/min to 150 °C), 250 °C injector temperature, 100:1 split ratio, 1.0 mL/min flow.

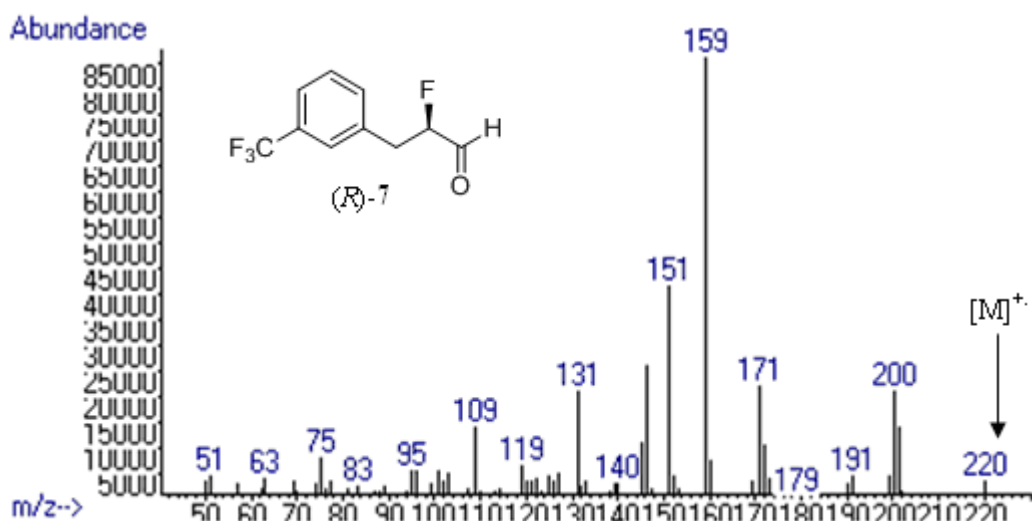

5 **Figure S1.1** Mass spectrum of the GC peak at 36.2 min showing the presence of (*R*)-7.

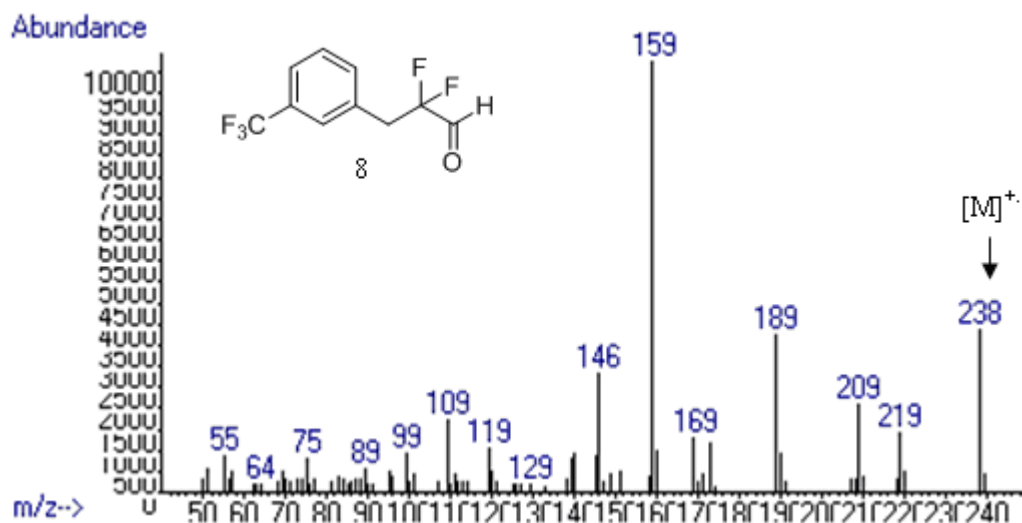

**Figure S1.2.** Mass spectrum of the GC peak at 33.1 min showing the presence of difluoroaldehyde 8.

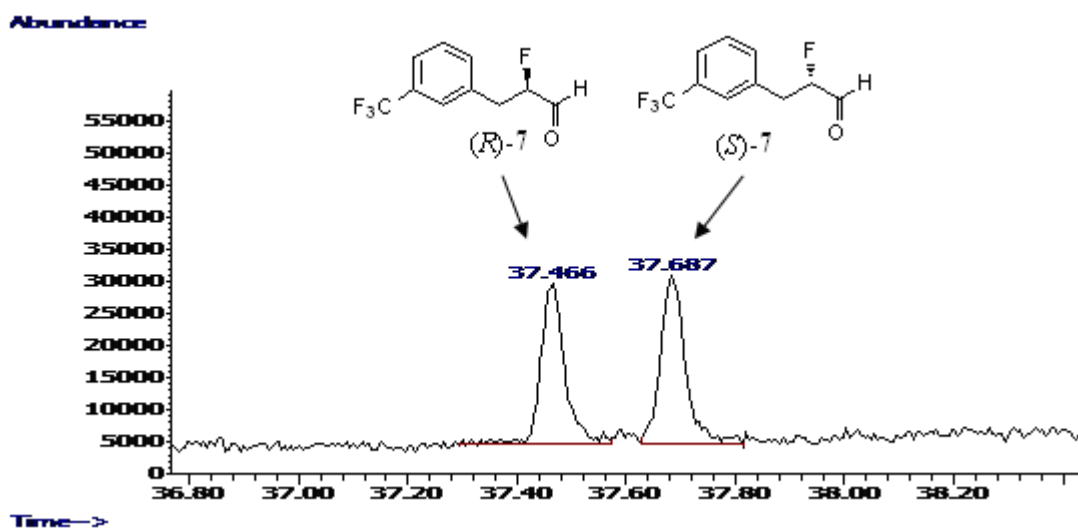

**Figure S1.3** Chiral phase GC chromatogram of a mixture of (*R*)- and (*S*)-7.

5

10 **Figure S1.4** Overlay of the <sup>19</sup>F-NMR spectra of (*2R,1'R*)-2 and (*2S,1'R*)-3 and an add mixture of both diastereoisomers, indicating a high diastereomeric ratio.

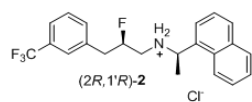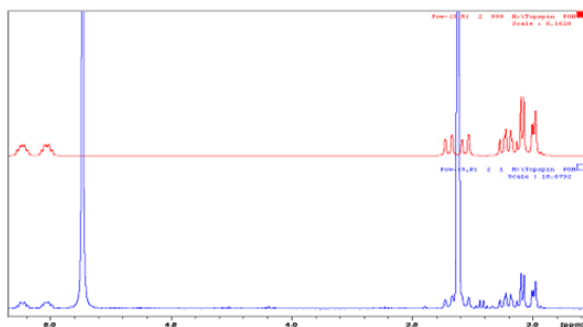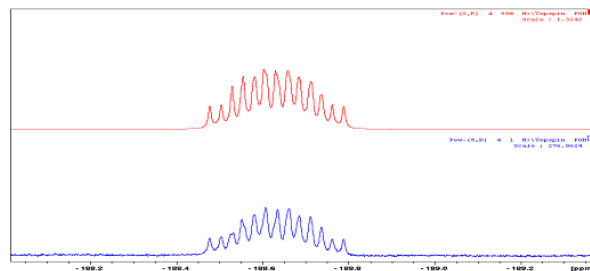

5

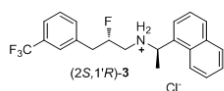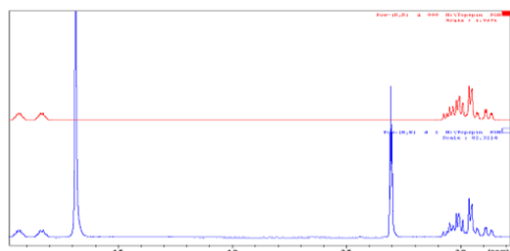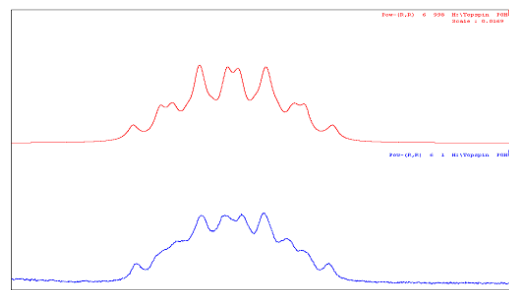

<sup>1</sup>H-NMR

<sup>19</sup>F-NMR

10 **Figure S1.5** (a) The simulated (red) and experimental (blue), <sup>1</sup>H NMR and <sup>19</sup>F-NMR spectra for (2*R*,1'*R*)-2 and (2*S*,1'*R*)-3. Spectra were recorded on a 500MHz Bruker instrument in CD<sub>3</sub>OH.

**Table 1. Crystal data and structure refinement for (2*R*,1'*R*)-2.**

|                                   |                                                     |          |
|-----------------------------------|-----------------------------------------------------|----------|
| Identification code               | 2                                                   |          |
| Empirical formula                 | C <sub>22</sub> H <sub>22</sub> Cl F <sub>4</sub> N |          |
| Formula weight                    | 411.86                                              |          |
| 5 Temperature                     | 173(2) K                                            |          |
| Wavelength                        | 1.54178 Å                                           |          |
| Crystal system                    | Orthorhombic                                        |          |
| Space group                       | P2(1)2(1)2(1)                                       |          |
| Unit cell dimensions              | a = 7.2710(4) Å                                     | α = 90°. |
| 10                                | b = 13.0197(6) Å                                    | β = 90°. |
|                                   | c = 22.3322(11) Å                                   | γ = 90°. |
| Volume                            | 2114.11(18) Å <sup>3</sup>                          |          |
| Z                                 | 4                                                   |          |
| Density (calculated)              | 1.294 Mg/m <sup>3</sup>                             |          |
| 15 Absorption coefficient         | 1.967 mm <sup>-1</sup>                              |          |
| F(000)                            | 856                                                 |          |
| Crystal size                      | 0.12 x 0.05 x 0.05 mm <sup>3</sup>                  |          |
| Theta range for data collection   | 3.93 to 68.06°.                                     |          |
| Index ranges                      | -8 ≤ h ≤ 8, -15 ≤ k ≤ 15, -26 ≤ l ≤ 26              |          |
| 20 Reflections collected          | 26693                                               |          |
| Independent reflections           | 3740 [R(int) = 0.0433]                              |          |
| Completeness to theta = 67.00°    | 98.3 %                                              |          |
| Absorption correction             | Multiscan                                           |          |
| Max. and min. transmission        | 1.000 and 0.723                                     |          |
| 25 Refinement method              | Full-matrix least-squares on F <sup>2</sup>         |          |
| Data / restraints / parameters    | 3740 / 2 / 250                                      |          |
| Goodness-of-fit on F <sup>2</sup> | 1.039                                               |          |
| Final R indices [I > 2σ(I)]       | R1 = 0.0704, wR2 = 0.1892                           |          |
| R indices (all data)              | R1 = 0.0726, wR2 = 0.1918                           |          |
| 30 Absolute structure parameter   | 0.05(3)                                             |          |
| Largest diff. peak and hole       | 0.972 and -0.609 e.Å <sup>-3</sup>                  |          |

**Table 2.** Atomic coordinates ( $\times 10^4$ ) and equivalent isotropic displacement parameters ( $\text{\AA}^2 \times 10^3$ ) for 2.  $U(\text{eq})$  is defined as one third of the trace of the orthogonalized  $U^{ij}$  tensor.

|          | x        | y        | z       | U(eq)  |
|----------|----------|----------|---------|--------|
| 5        |          |          |         |        |
| Cl(1)    | 3252(1)  | 6821(1)  | 641(1)  | 36(1)  |
| C(1)     | 8058(6)  | 4789(3)  | 541(2)  | 31(1)  |
| C(2)     | 6539(6)  | 4609(3)  | 881(2)  | 37(1)  |
| C(3)     | 6405(6)  | 3732(4)  | 1250(2) | 43(1)  |
| 10 C(4)  | 7793(6)  | 3046(3)  | 1265(2) | 41(1)  |
| C(5)     | 9384(6)  | 3178(3)  | 920(2)  | 35(1)  |
| C(6)     | 10852(8) | 2458(4)  | 931(2)  | 50(1)  |
| C(7)     | 12362(7) | 2586(4)  | 600(3)  | 55(1)  |
| C(8)     | 12549(8) | 3466(4)  | 225(2)  | 50(1)  |
| 15 C(9)  | 11196(6) | 4183(4)  | 205(2)  | 39(1)  |
| C(10)    | 9561(6)  | 4076(3)  | 549(2)  | 33(1)  |
| C(11)    | 8147(7)  | 5712(3)  | 119(2)  | 33(1)  |
| N(12)    | 7429(5)  | 6666(2)  | 409(1)  | 28(1)  |
| C(13)    | 8432(6)  | 6969(3)  | 969(2)  | 31(1)  |
| 20 F(14) | 7435(4)  | 8677(2)  | 825(1)  | 45(1)  |
| C(14)    | 7562(6)  | 7892(3)  | 1259(2) | 31(1)  |
| C(15)    | 8755(6)  | 8276(4)  | 1770(2) | 39(1)  |
| C(16)    | 7929(6)  | 9105(3)  | 2159(2) | 33(1)  |
| C(17)    | 6370(7)  | 9647(3)  | 2008(2) | 39(1)  |
| 25 C(18) | 5668(7)  | 10411(4) | 2386(2) | 43(1)  |
| C(19)    | 6536(8)  | 10626(4) | 2923(2) | 47(1)  |
| C(20)    | 8092(8)  | 10080(4) | 3077(2) | 53(1)  |
| C(21)    | 8772(8)  | 9324(4)  | 2709(2) | 49(1)  |
| C(22)    | 7079(8)  | 5515(3)  | -449(2) | 49(1)  |
| 30 C(23) | 3917(12) | 10935(5) | 2233(2) | 84(3)  |
| F(1)     | 2720(8)  | 10941(4) | 2647(3) | 89(2)  |
| F(2)     | 4237(10) | 12002(6) | 2245(3) | 108(2) |
| F(3)     | 2838(12) | 10446(6) | 1841(4) | 125(2) |
| F(4)     | 3989(15) | 11210(8) | 1654(4) | 155(3) |
| 35       |          |          |         |        |

**Table 3.** Bond lengths [Å] and angles [°] for (2*R*,1'*R*)- **2**.

---

|                 |           |
|-----------------|-----------|
| C(1)-C(2)       | 1.361(6)  |
| C(1)-C(10)      | 1.434(6)  |
| 5 C(1)-C(11)    | 1.528(5)  |
| C(2)-C(3)       | 1.412(6)  |
| C(2)-H(2A)      | 0.9500    |
| C(3)-C(4)       | 1.349(6)  |
| C(3)-H(3A)      | 0.9500    |
| 10 C(4)-C(5)    | 1.401(6)  |
| C(4)-H(4A)      | 0.9500    |
| C(5)-C(6)       | 1.420(6)  |
| C(5)-C(10)      | 1.439(6)  |
| C(6)-C(7)       | 1.334(8)  |
| 15 C(6)-H(6A)   | 0.9500    |
| C(7)-C(8)       | 1.426(8)  |
| C(7)-H(7A)      | 0.9500    |
| C(8)-C(9)       | 1.357(7)  |
| C(8)-H(8A)      | 0.9500    |
| 20 C(9)-C(10)   | 1.422(6)  |
| C(9)-H(9A)      | 0.9500    |
| C(11)-N(12)     | 1.495(5)  |
| C(11)-C(22)     | 1.509(6)  |
| C(11)-H(11A)    | 1.0000    |
| 25 N(12)-C(13)  | 1.500(5)  |
| N(12)-H(12A)    | 0.962(19) |
| N(12)-H(12B)    | 0.97(2)   |
| C(13)-C(14)     | 1.505(5)  |
| C(13)-H(13A)    | 0.9900    |
| 30 C(13)-H(13B) | 0.9900    |
| F(14)-C(14)     | 1.411(4)  |
| C(14)-C(15)     | 1.519(6)  |
| C(14)-H(14A)    | 1.0000    |
| C(15)-C(16)     | 1.509(6)  |
| 35 C(15)-H(15A) | 0.9900    |
| C(15)-H(15B)    | 0.9900    |
| C(16)-C(17)     | 1.377(6)  |
| C(16)-C(21)     | 1.402(6)  |
| C(17)-C(18)     | 1.401(6)  |
| 40 C(17)-H(17A) | 0.9500    |
| C(18)-C(19)     | 1.385(7)  |
| C(18)-C(23)     | 1.484(9)  |
| C(19)-C(20)     | 1.379(8)  |
| C(19)-H(19A)    | 0.9500    |
| 45 C(20)-C(21)  | 1.375(7)  |
| C(20)-H(20A)    | 0.9500    |
| C(21)-H(21A)    | 0.9500    |
| C(22)-H(22A)    | 0.9800    |
| C(22)-H(22B)    | 0.9800    |
| 50 C(22)-H(22C) | 0.9800    |
| C(23)-F(1)      | 1.270(9)  |
| C(23)-F(3)      | 1.336(10) |
| C(23)-F(4)      | 1.342(11) |
| C(23)-F(2)      | 1.409(10) |
| 55 F(2)-F(4)    | 1.684(12) |
| F(3)-F(4)       | 1.365(11) |

|                       |          |
|-----------------------|----------|
| C(2)-C(1)-C(10)       | 120.0(4) |
| C(2)-C(1)-C(11)       | 120.9(4) |
| C(10)-C(1)-C(11)      | 119.0(4) |
| C(1)-C(2)-C(3)        | 121.4(4) |
| 5 C(1)-C(2)-H(2A)     | 119.3    |
| C(3)-C(2)-H(2A)       | 119.3    |
| C(4)-C(3)-C(2)        | 119.9(4) |
| C(4)-C(3)-H(3A)       | 120.0    |
| C(2)-C(3)-H(3A)       | 120.0    |
| 10 C(3)-C(4)-C(5)     | 121.5(4) |
| C(3)-C(4)-H(4A)       | 119.2    |
| C(5)-C(4)-H(4A)       | 119.2    |
| C(4)-C(5)-C(6)        | 122.0(4) |
| C(4)-C(5)-C(10)       | 119.4(4) |
| 15 C(6)-C(5)-C(10)    | 118.6(4) |
| C(7)-C(6)-C(5)        | 121.8(5) |
| C(7)-C(6)-H(6A)       | 119.1    |
| C(5)-C(6)-H(6A)       | 119.1    |
| C(6)-C(7)-C(8)        | 120.3(4) |
| 20 C(6)-C(7)-H(7A)    | 119.9    |
| C(8)-C(7)-H(7A)       | 119.9    |
| C(9)-C(8)-C(7)        | 120.1(5) |
| C(9)-C(8)-H(8A)       | 119.9    |
| C(7)-C(8)-H(8A)       | 119.9    |
| 25 C(8)-C(9)-C(10)    | 121.5(5) |
| C(8)-C(9)-H(9A)       | 119.3    |
| C(10)-C(9)-H(9A)      | 119.3    |
| C(9)-C(10)-C(1)       | 124.5(4) |
| C(9)-C(10)-C(5)       | 117.7(4) |
| 30 C(1)-C(10)-C(5)    | 117.8(4) |
| N(12)-C(11)-C(22)     | 109.0(4) |
| N(12)-C(11)-C(1)      | 111.8(3) |
| C(22)-C(11)-C(1)      | 111.2(3) |
| N(12)-C(11)-H(11A)    | 108.2    |
| 35 C(22)-C(11)-H(11A) | 108.2    |
| C(1)-C(11)-H(11A)     | 108.2    |
| C(11)-N(12)-C(13)     | 114.2(3) |
| C(11)-N(12)-H(12A)    | 111(2)   |
| C(13)-N(12)-H(12A)    | 114(2)   |
| 40 C(11)-N(12)-H(12B) | 105(4)   |
| C(13)-N(12)-H(12B)    | 112(4)   |
| H(12A)-N(12)-H(12B)   | 98(4)    |
| C(14)-C(13)-N(12)     | 111.4(3) |
| C(14)-C(13)-H(13A)    | 109.4    |
| 45 N(12)-C(13)-H(13A) | 109.4    |
| C(14)-C(13)-H(13B)    | 109.4    |
| N(12)-C(13)-H(13B)    | 109.4    |
| H(13A)-C(13)-H(13B)   | 108.0    |
| F(14)-C(14)-C(13)     | 108.1(3) |
| 50 F(14)-C(14)-C(15)  | 108.3(3) |
| C(13)-C(14)-C(15)     | 110.3(3) |
| F(14)-C(14)-H(14A)    | 110.0    |
| C(13)-C(14)-H(14A)    | 110.0    |
| C(15)-C(14)-H(14A)    | 110.0    |
| 55 C(16)-C(15)-C(14)  | 116.1(4) |
| C(16)-C(15)-H(15A)    | 108.3    |
| C(14)-C(15)-H(15A)    | 108.3    |
| C(16)-C(15)-H(15B)    | 108.2    |



|                        |          |
|------------------------|----------|
| C(14)-C(15)-H(15B)     | 108.2    |
| H(15A)-C(15)-H(15B)    | 107.4    |
| C(17)-C(16)-C(21)      | 118.0(4) |
| C(17)-C(16)-C(15)      | 123.6(4) |
| 5 C(21)-C(16)-C(15)    | 118.4(4) |
| C(16)-C(17)-C(18)      | 121.1(4) |
| C(16)-C(17)-H(17A)     | 119.4    |
| C(18)-C(17)-H(17A)     | 119.4    |
| C(19)-C(18)-C(17)      | 119.9(5) |
| 10 C(19)-C(18)-C(23)   | 119.9(4) |
| C(17)-C(18)-C(23)      | 120.0(4) |
| C(20)-C(19)-C(18)      | 119.1(4) |
| C(20)-C(19)-H(19A)     | 120.4    |
| C(18)-C(19)-H(19A)     | 120.4    |
| 15 C(21)-C(20)-C(19)   | 120.9(4) |
| C(21)-C(20)-H(20A)     | 119.5    |
| C(19)-C(20)-H(20A)     | 119.5    |
| C(20)-C(21)-C(16)      | 120.9(5) |
| C(20)-C(21)-H(21A)     | 119.6    |
| 20 C(16)-C(21)-H(21A)  | 119.6    |
| C(11)-C(22)-H(22A)     | 109.5    |
| C(11)-C(22)-H(22B)     | 109.5    |
| H(22A)-C(22)-H(22B)    | 109.5    |
| C(11)-C(22)-H(22C)     | 109.5    |
| 25 H(22A)-C(22)-H(22C) | 109.5    |
| H(22B)-C(22)-H(22C)    | 109.5    |
| F(1)-C(23)-F(3)        | 94.5(8)  |
| F(1)-C(23)-F(4)        | 136.6(8) |
| F(3)-C(23)-F(4)        | 61.3(5)  |
| 30 F(1)-C(23)-F(2)     | 95.3(5)  |
| F(3)-C(23)-F(2)        | 125.4(6) |
| F(4)-C(23)-F(2)        | 75.4(7)  |
| F(1)-C(23)-C(18)       | 115.0(5) |
| F(3)-C(23)-C(18)       | 115.8(5) |
| 35 F(4)-C(23)-C(18)    | 108.1(7) |
| F(2)-C(23)-C(18)       | 107.9(7) |
| C(23)-F(2)-F(4)        | 50.5(5)  |
| F(4)-F(3)-C(23)        | 59.6(6)  |
| F(3)-F(4)-C(23)        | 59.1(6)  |
| 40 F(3)-F(4)-F(2)      | 105.8(7) |
| C(23)-F(4)-F(2)        | 54.1(5)  |

---

Symmetry transformations used to generate equivalent atoms:

**Table 4.** Anisotropic displacement parameters ( $\text{\AA}^2 \times 10^3$ ) for (2*R*,1'*R*)-**2**. The anisotropic displacement factor exponent takes the form:  $-2\pi^2 [ h^2 a^{*2} U^{11} + \dots + 2 h k a^* b^* U^{12} ]$

|          | U <sup>11</sup> | U <sup>22</sup> | U <sup>33</sup> | U <sup>23</sup> | U <sup>13</sup> | U <sup>12</sup> |
|----------|-----------------|-----------------|-----------------|-----------------|-----------------|-----------------|
| 5        |                 |                 |                 |                 |                 |                 |
| Cl(1)    | 26(1)           | 44(1)           | 36(1)           | 13(1)           | 2(1)            | 5(1)            |
| C(1)     | 34(2)           | 25(2)           | 34(2)           | -3(2)           | -3(2)           | 2(2)            |
| C(2)     | 32(2)           | 32(2)           | 46(2)           | 5(2)            | 0(2)            | 1(2)            |
| C(3)     | 38(3)           | 41(2)           | 50(2)           | 12(2)           | 3(2)            | -3(2)           |
| 10 C(4)  | 42(3)           | 31(2)           | 50(2)           | 6(2)            | -7(2)           | -1(2)           |
| C(5)     | 35(2)           | 27(2)           | 43(2)           | -6(2)           | -11(2)          | 3(2)            |
| C(6)     | 58(3)           | 32(2)           | 60(3)           | -2(2)           | -16(3)          | 9(2)            |
| C(7)     | 45(3)           | 44(2)           | 78(4)           | -14(3)          | -9(3)           | 20(2)           |
| C(8)     | 39(2)           | 48(3)           | 64(3)           | -15(2)          | -1(2)           | 11(2)           |
| 15 C(9)  | 37(2)           | 38(2)           | 42(2)           | -11(2)          | 1(2)            | 4(2)            |
| C(10)    | 35(2)           | 29(2)           | 34(2)           | -9(2)           | -5(2)           | 3(2)            |
| C(11)    | 38(2)           | 30(2)           | 32(2)           | -1(2)           | 12(2)           | 6(2)            |
| N(12)    | 27(2)           | 26(2)           | 31(2)           | 5(1)            | 2(1)            | 2(1)            |
| C(13)    | 29(2)           | 33(2)           | 33(2)           | -1(2)           | 2(2)            | 2(2)            |
| 20 F(14) | 68(2)           | 32(1)           | 35(1)           | 2(1)            | 1(1)            | 10(1)           |
| C(14)    | 32(2)           | 30(2)           | 31(2)           | 2(2)            | -1(2)           | 0(2)            |
| C(15)    | 36(2)           | 41(2)           | 38(2)           | -4(2)           | -4(2)           | -2(2)           |
| C(16)    | 37(2)           | 31(2)           | 29(2)           | 1(2)            | -3(2)           | -5(2)           |
| C(17)    | 49(3)           | 41(2)           | 27(2)           | -3(2)           | -4(2)           | 4(2)            |
| 25 C(18) | 56(3)           | 43(2)           | 30(2)           | -3(2)           | 3(2)            | 8(2)            |
| C(19)    | 67(3)           | 41(2)           | 33(2)           | -8(2)           | 1(2)            | 2(2)            |
| C(20)    | 62(3)           | 59(3)           | 38(2)           | -13(2)          | -11(2)          | -10(3)          |
| C(21)    | 53(3)           | 57(3)           | 37(2)           | 0(2)            | -11(2)          | -1(2)           |
| C(22)    | 75(4)           | 36(2)           | 36(2)           | -1(2)           | -1(2)           | 1(2)            |
| 30 C(23) | 153(7)          | 72(4)           | 26(2)           | -24(2)          | -22(3)          | 61(5)           |

**Table 5.** Hydrogen coordinates ( $\times 10^4$ ) and isotropic displacement parameters ( $\text{\AA}^2 \times 10^{-3}$ ) for (2*R*,1'*R*)-**2**.

|           | x        | y        | z       | U(eq)  |
|-----------|----------|----------|---------|--------|
| 5         |          |          |         |        |
| H(2A)     | 5548     | 5084     | 869     | 44     |
| H(3A)     | 5337     | 3626     | 1487    | 51     |
| H(4A)     | 7690     | 2459     | 1516    | 49     |
| 10 H(6A)  | 10755    | 1870     | 1180    | 60     |
| H(7A)     | 13317    | 2089     | 615     | 67     |
| H(8A)     | 13624    | 3550     | -12     | 60     |
| H(9A)     | 11345    | 4769     | -43     | 47     |
| H(11A)    | 9463     | 5830     | 9       | 40     |
| 15 H(12A) | 6110(30) | 6640(30) | 452(18) | 21(10) |
| H(12B)    | 7490(90) | 7190(30) | 100(20) | 67(18) |
| H(13A)    | 8424     | 6387     | 1254    | 38     |
| H(13B)    | 9729     | 7127     | 869     | 38     |
| H(14A)    | 6309     | 7712     | 1411    | 37     |
| 20 H(15A) | 9068     | 7684     | 2029    | 46     |
| H(15B)    | 9919     | 8540     | 1600    | 46     |
| H(17A)    | 5760     | 9500     | 1642    | 47     |
| H(19A)    | 6068     | 11142    | 3182    | 57     |
| H(20A)    | 8702     | 10228    | 3444    | 64     |
| 25 H(21A) | 9827     | 8946     | 2828    | 59     |
| H(22A)    | 7159     | 6118     | -710    | 74     |
| H(22B)    | 5788     | 5381     | -350    | 74     |
| H(22C)    | 7596     | 4916     | -655    | 74     |

**Table 6.** Torsion angles [°] for (2*R*,1'*R*)- 2.

|                            |           |
|----------------------------|-----------|
| C(10)-C(1)-C(2)-C(3)       | 0.5(6)    |
| C(11)-C(1)-C(2)-C(3)       | 176.9(4)  |
| 5 C(1)-C(2)-C(3)-C(4)      | -0.7(7)   |
| C(2)-C(3)-C(4)-C(5)        | -0.2(7)   |
| C(3)-C(4)-C(5)-C(6)        | -179.7(5) |
| C(3)-C(4)-C(5)-C(10)       | 1.2(6)    |
| C(4)-C(5)-C(6)-C(7)        | 179.8(5)  |
| 10 C(10)-C(5)-C(6)-C(7)    | -1.1(7)   |
| C(5)-C(6)-C(7)-C(8)        | 0.4(8)    |
| C(6)-C(7)-C(8)-C(9)        | 0.5(8)    |
| C(7)-C(8)-C(9)-C(10)       | -0.7(7)   |
| C(8)-C(9)-C(10)-C(1)       | -178.5(4) |
| 15 C(8)-C(9)-C(10)-C(5)    | 0.0(6)    |
| C(2)-C(1)-C(10)-C(9)       | 179.1(4)  |
| C(11)-C(1)-C(10)-C(9)      | 2.7(6)    |
| C(2)-C(1)-C(10)-C(5)       | 0.6(6)    |
| C(11)-C(1)-C(10)-C(5)      | -175.9(3) |
| 20 C(4)-C(5)-C(10)-C(9)    | 180.0(4)  |
| C(6)-C(5)-C(10)-C(9)       | 0.9(6)    |
| C(4)-C(5)-C(10)-C(1)       | -1.4(6)   |
| C(6)-C(5)-C(10)-C(1)       | 179.5(4)  |
| C(2)-C(1)-C(11)-N(12)      | 44.0(5)   |
| 25 C(10)-C(1)-C(11)-N(12)  | -139.6(4) |
| C(2)-C(1)-C(11)-C(22)      | -78.1(5)  |
| C(10)-C(1)-C(11)-C(22)     | 98.3(5)   |
| C(22)-C(11)-N(12)-C(13)    | -177.7(4) |
| C(1)-C(11)-N(12)-C(13)     | 58.9(5)   |
| 30 C(11)-N(12)-C(13)-C(14) | -176.2(3) |
| N(12)-C(13)-C(14)-F(14)    | -53.6(4)  |
| N(12)-C(13)-C(14)-C(15)    | -171.8(3) |
| F(14)-C(14)-C(15)-C(16)    | 70.2(5)   |
| C(13)-C(14)-C(15)-C(16)    | -171.7(3) |
| 35 C(14)-C(15)-C(16)-C(17) | -12.9(6)  |
| C(14)-C(15)-C(16)-C(21)    | 165.9(4)  |
| C(21)-C(16)-C(17)-C(18)    | 1.4(7)    |
| C(15)-C(16)-C(17)-C(18)    | -179.8(4) |
| C(16)-C(17)-C(18)-C(19)    | -0.5(7)   |
| 40 C(16)-C(17)-C(18)-C(23) | -175.9(5) |
| C(17)-C(18)-C(19)-C(20)    | 0.1(8)    |
| C(23)-C(18)-C(19)-C(20)    | 175.5(6)  |
| C(18)-C(19)-C(20)-C(21)    | -0.6(8)   |
| C(19)-C(20)-C(21)-C(16)    | 1.6(8)    |
| 45 C(17)-C(16)-C(21)-C(20) | -2.0(7)   |
| C(15)-C(16)-C(21)-C(20)    | 179.2(5)  |
| C(19)-C(18)-C(23)-F(1)     | -47.5(9)  |
| C(17)-C(18)-C(23)-F(1)     | 127.8(6)  |
| C(19)-C(18)-C(23)-F(3)     | -156.3(6) |
| 50 C(17)-C(18)-C(23)-F(3)  | 19.1(10)  |
| C(19)-C(18)-C(23)-F(4)     | 137.5(7)  |
| C(17)-C(18)-C(23)-F(4)     | -47.1(9)  |
| C(19)-C(18)-C(23)-F(2)     | 57.4(7)   |
| C(17)-C(18)-C(23)-F(2)     | -127.2(5) |
| 55 F(1)-C(23)-F(2)-F(4)    | -136.8(8) |
| F(3)-C(23)-F(2)-F(4)       | -37.5(8)  |
| C(18)-C(23)-F(2)-F(4)      | 104.7(7)  |
| F(1)-C(23)-F(3)-F(4)       | 142.0(7)  |

---

|                         |           |
|-------------------------|-----------|
| F(2)-C(23)-F(3)-F(4)    | 42.2(9)   |
| C(18)-C(23)-F(3)-F(4)   | -97.4(8)  |
| C(23)-F(3)-F(4)-F(2)    | -28.5(6)  |
| F(1)-C(23)-F(4)-F(3)    | -63.3(12) |
| 5 F(2)-C(23)-F(4)-F(3)  | -145.5(7) |
| C(18)-C(23)-F(4)-F(3)   | 110.1(7)  |
| F(1)-C(23)-F(4)-F(2)    | 82.2(10)  |
| F(3)-C(23)-F(4)-F(2)    | 145.5(7)  |
| C(18)-C(23)-F(4)-F(2)   | -104.4(8) |
| 10 C(23)-F(2)-F(4)-F(3) | 30.4(7)   |

---

Symmetry transformations used to generate equivalent atoms:

15

**Table 7.** Hydrogen bonds for (2*R*,1'*R*)-**2** [Å and °].

20

| D-H...A              | d(D-H)    | d(H...A) | d(D...A) | <(DHA) |
|----------------------|-----------|----------|----------|--------|
| N(12)-H(12A)...Cl(1) | 0.962(19) | 2.14(2)  | 3.088(4) | 170(3) |
| N(12)-H(12B)...F(14) | 0.97(2)   | 2.52(6)  | 2.778(4) | 95(4)  |

25

Symmetry transformations used to generate equivalent atoms:
